# Supplementary material for: Structural insights into molecular mechanism for N6-adenosine methylation by MT-A70 family methyltransferase METTL4
Source: PubMed Central journal article supplement (PMC9512776; doi:10.1038/s41467-022-33277-x), 2022-09-26
Supplement: 41467_2022_33277_MOESM1_ESM.pdf [file 41467_2022_33277_MOESM1_ESM.pdf]

1 **Supplementary Information**

2

3

4 **Structural insights into molecular mechanism for *N*<sup>6</sup>-adenosine**  
5 **methylation by MT-A70 family methyltransferase METTL4**

6

7 Qiang Luo<sup>1,3,†</sup>, Jiezhen Mo<sup>2,†</sup>, Hao Chen<sup>4,†</sup>, Zetao Hu<sup>1</sup>, Baihui Wang<sup>3</sup>, Jiabing Wu<sup>3</sup>,

8 Ziyu Liang<sup>2</sup>, Wenhao Xie<sup>3</sup>, Kangxi Du<sup>3</sup>, Maolin Peng<sup>3</sup>, Yingping Li<sup>3</sup>, Tianyang Li<sup>3</sup>,

9 Yangyi Zhang<sup>4</sup>, Xiaoyan Shi<sup>4</sup>, Wen-Hui Shen<sup>3,5</sup>, Yang Shi<sup>6\*</sup>, Aiwu Dong<sup>3\*</sup>, Hailin

10 Wang<sup>2,7\*</sup>, Jinbiao Ma<sup>1\*</sup>

11

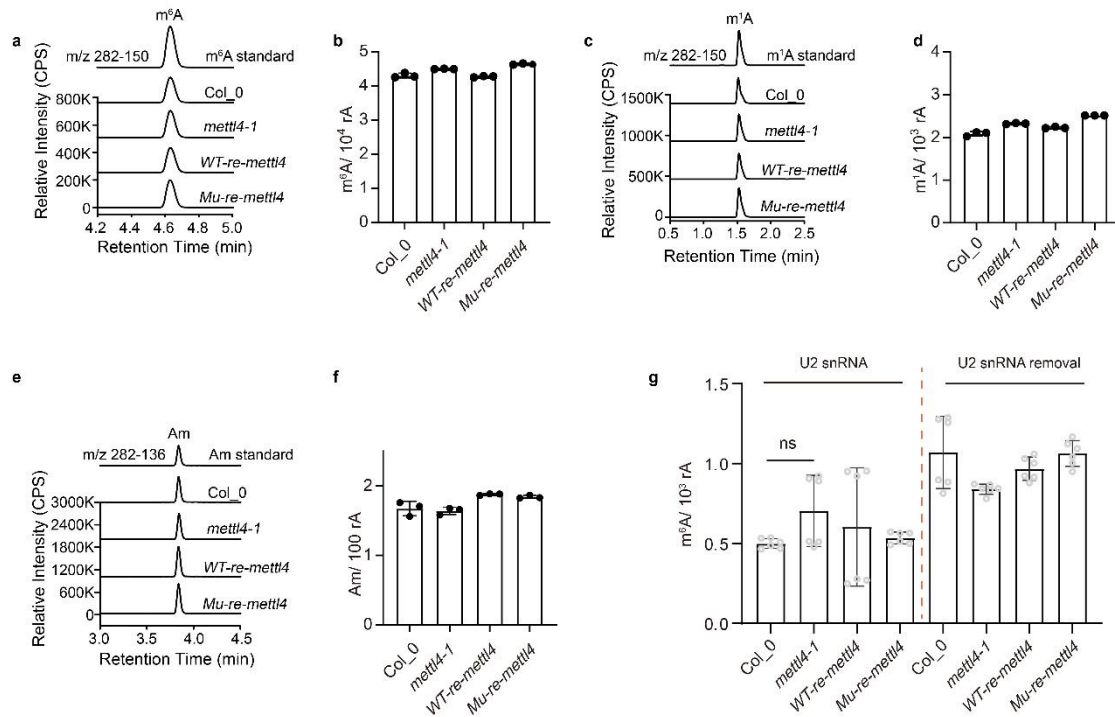

12

13 **Supplementary Fig.1** | Detection the RNA modification changes in wild-type and

14 mutants. **a.** UHPLC-MRM-MS/MS chromatograms of m<sup>6</sup>A modification in total RNA

15 and quantification **(b).** **c.** UHPLC-MRM-MS/MS chromatograms of m<sup>1</sup>A modification

16 in total RNA and quantification **(d).** **e.** UHPLC-MRM-MS/MS chromatograms of Am

17 modification in total RNA and quantification **(f).** **g.** The quantification of m<sup>6</sup>Am

18 abundance in U2 snRNA and residual RNAs.

19

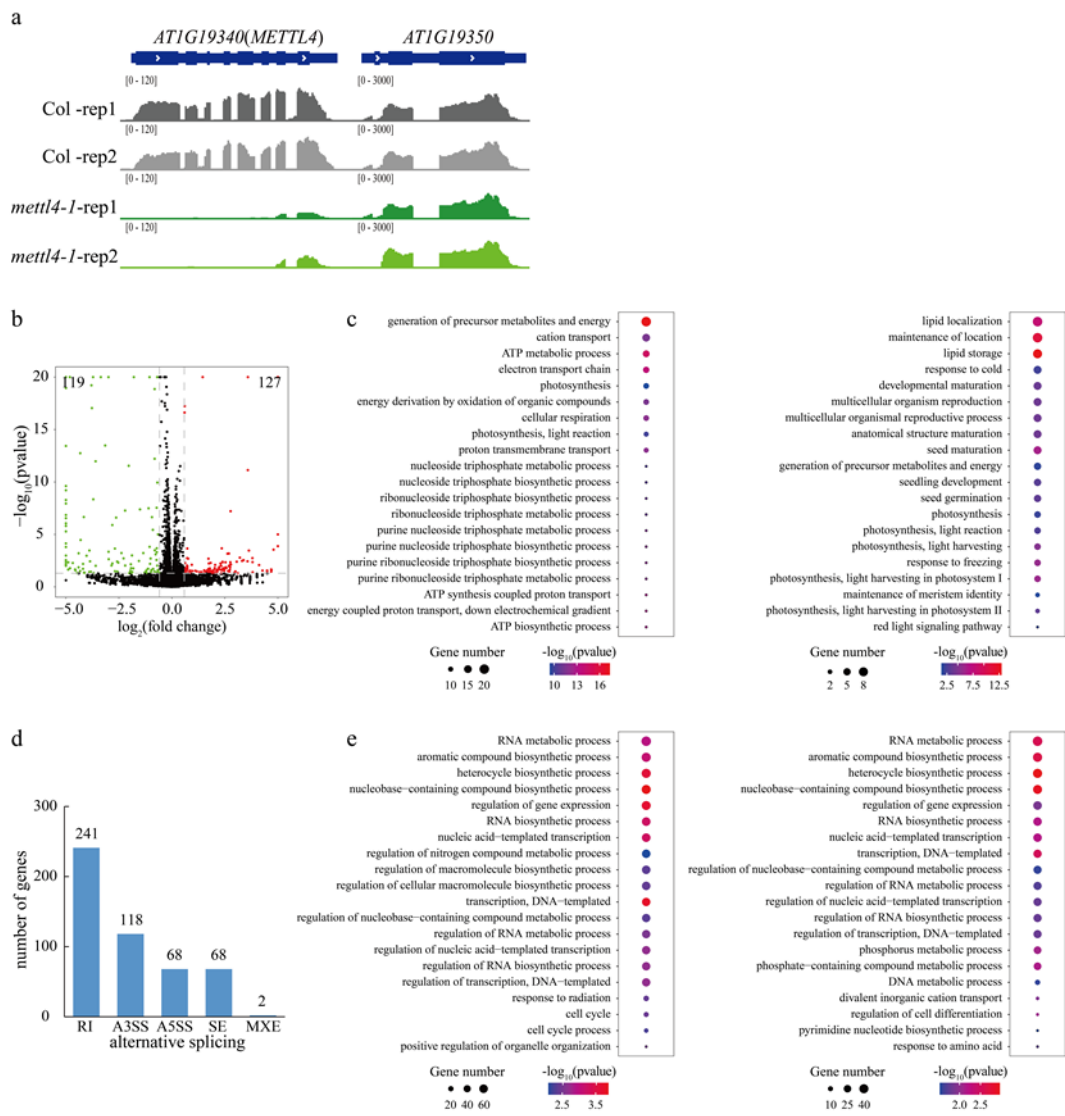

20

21 **Supplementary Fig.2** | Transcriptome analysis of the *METTL4* knockout mutant. (a):

22 IGV screen shots presenting the normalized read densities of *METTL4* and its adjacent

23 gene based on an RNA-sequencing analysis of two biological replicates of the wild-

24 type Col-0 (WT) and the *mettl4-1* mutant. (b): Volcano plot presenting gene

25 transcription changes following the knockdown of *METTL4*. Green and red points

26 represent the genes exhibiting down- and up-regulated expression ( $> 1.5$ -fold change,

27  $p < 0.05$ ), respectively, whereas the black points represent the genes with unchanged

28 expression, in the *mettl4-1* mutant compared with WT. (c): Functional enrichment

29 analysis of genes with significantly up- (left) or down-regulated (right) expression  
30 levels. The size of each point represents the number of genes, and p values are indicated  
31 with various colors. (d): The histogram shows the numbers of genes with alternatively  
32 splicing change in the *mettl4-1* mutant compared with WT (threshold of  $|\Delta\psi| > 0.1$ ,  $p <$   
33  $0.05$ ). RI: retained intron; A3SS: alternative 3' splice site; A5SS: alternative 5' splice  
34 site; SE: skipped exon; MXE: mutually exclusive exons. (e): Functional enrichment  
35 analysis of genes with alternatively splicing (left) and RI changes (right). The size of  
36 each point represents the number of genes, and p values are indicated with various  
37 colors.

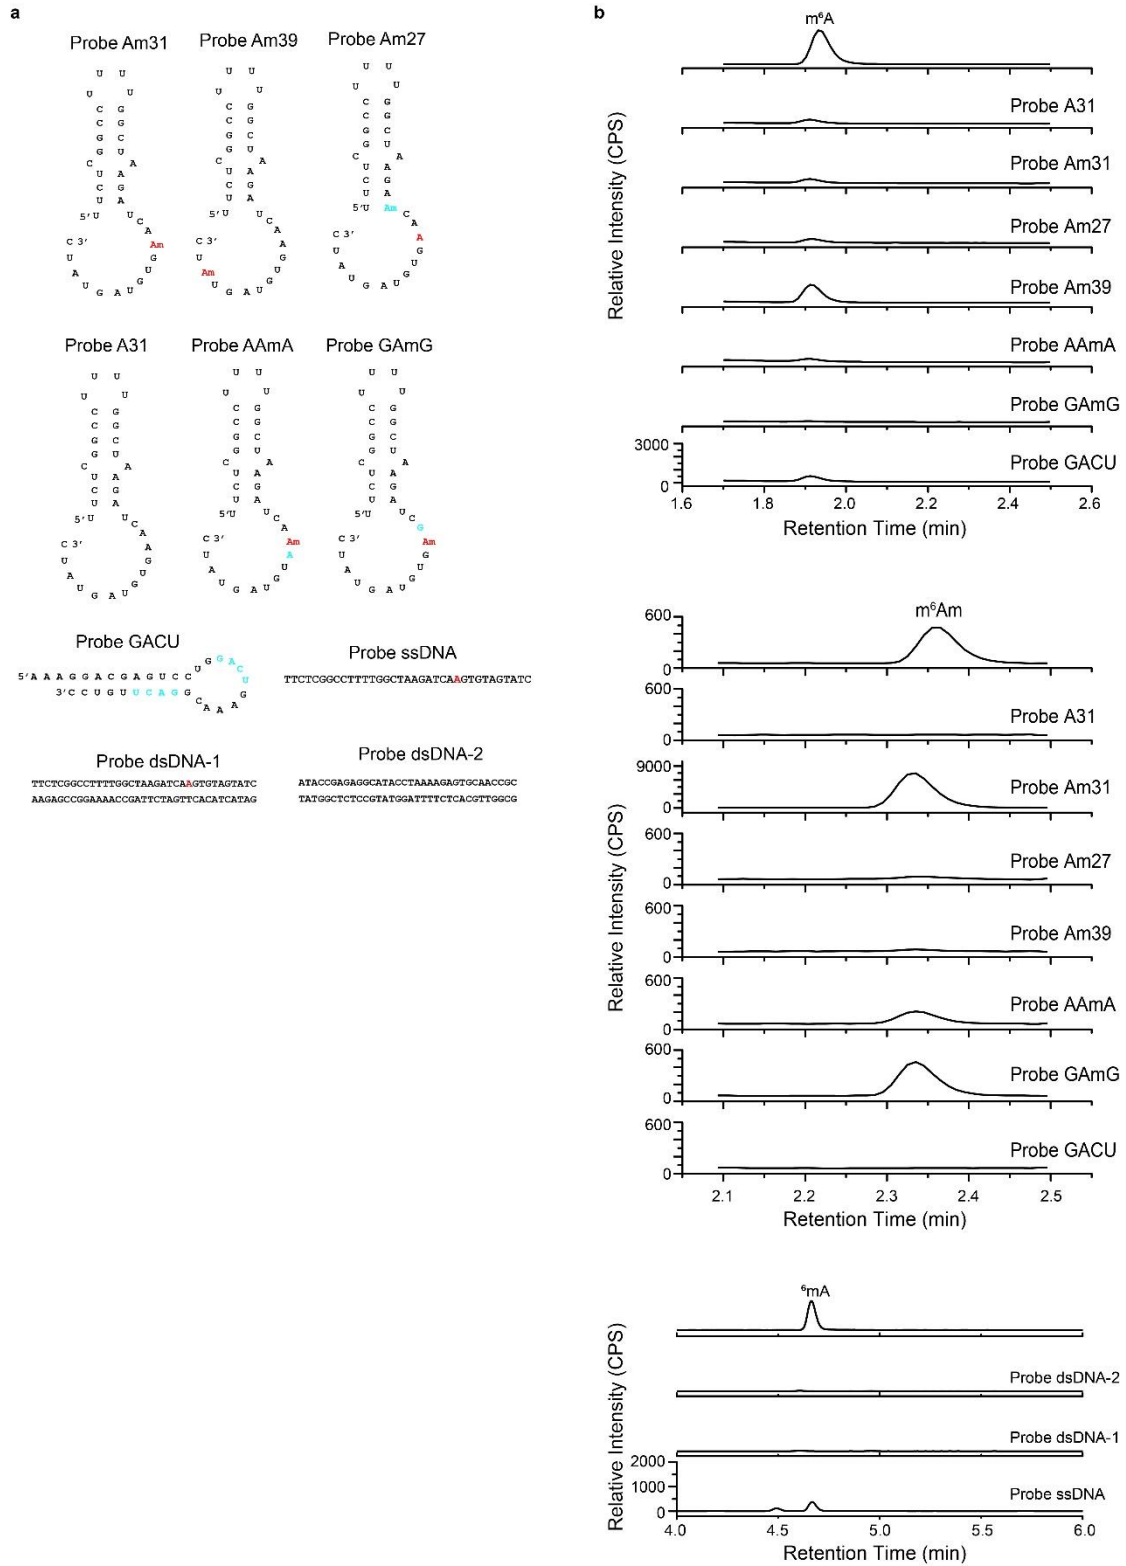

38

39 **Supplementary Fig.3** | Enzyme activity of METTL4 for different substrates. **a.** The

40 fragments of Arabidopsis U2 snRNA for enzyme activity. **b.** Chromatograms of

41 METTL4 m<sup>6</sup>Am RNA and <sup>6</sup>mA DNA methylation activity *in vitro* assay obtained from

42 UHPLC-MS/MS using the fragments of **(a)**.

43

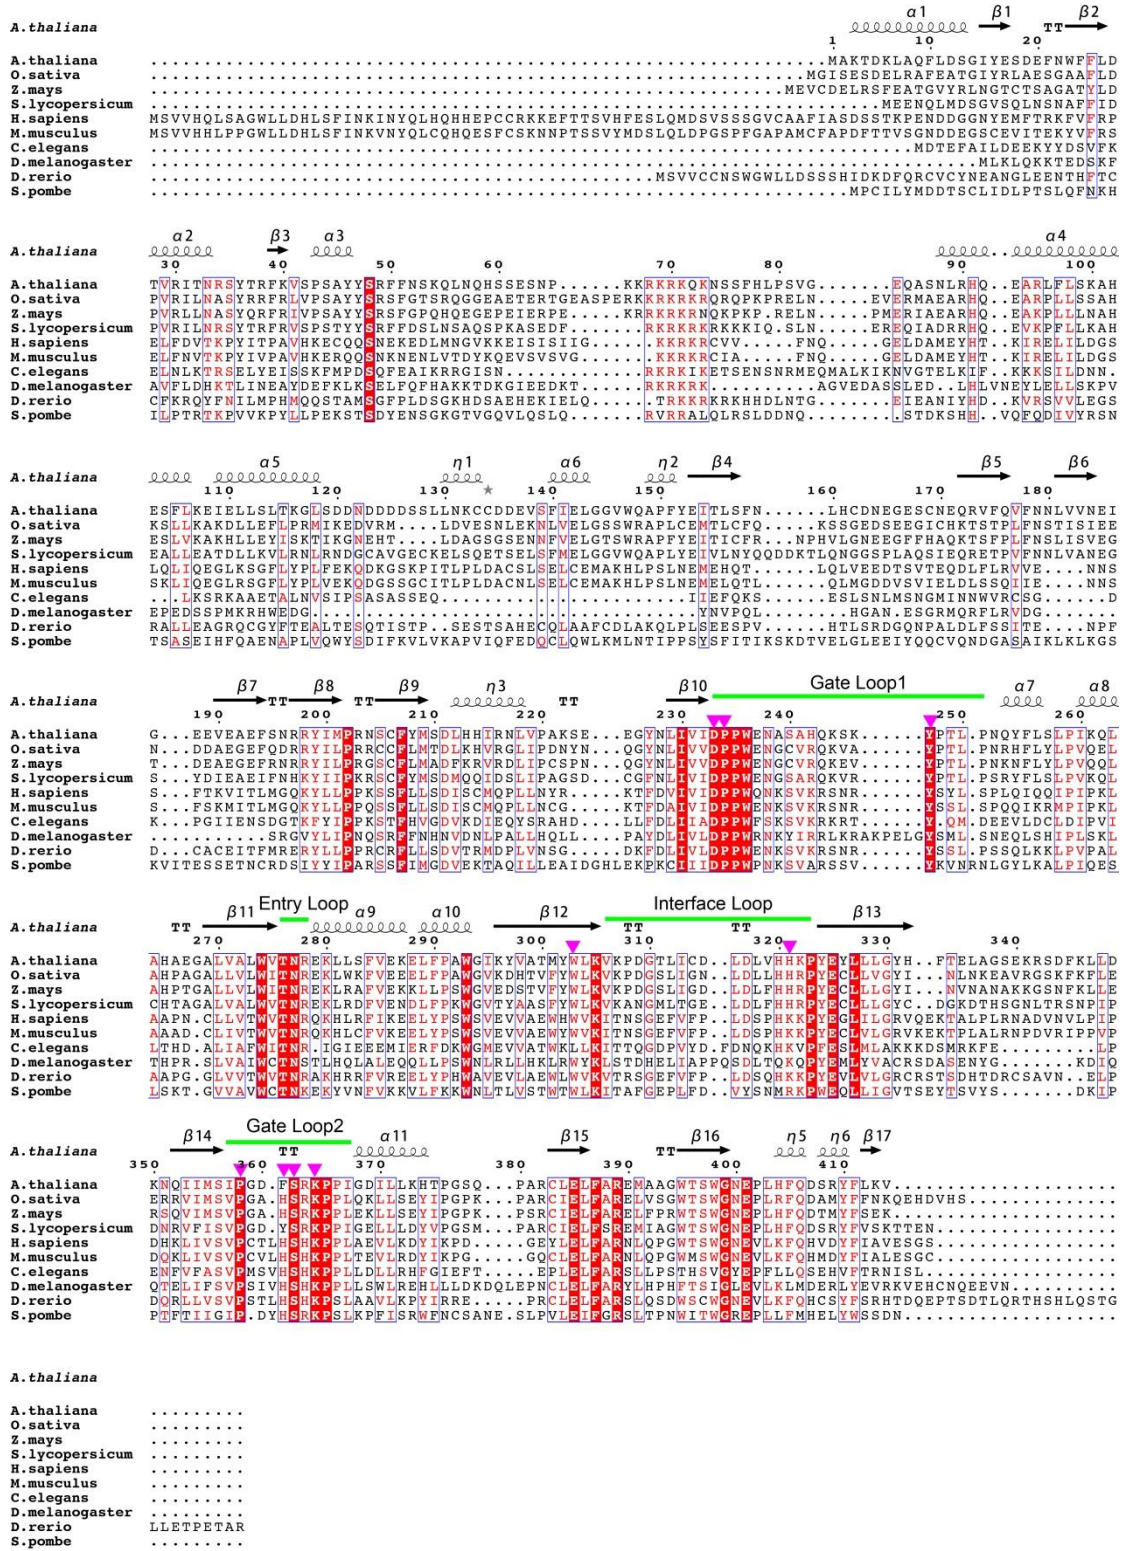

44  
45  
46  
47

Supplementary Fig.4 | Sequence alignment of METTL4 from different species.

Residues involved in Am binding are indicated by magenta arrow.

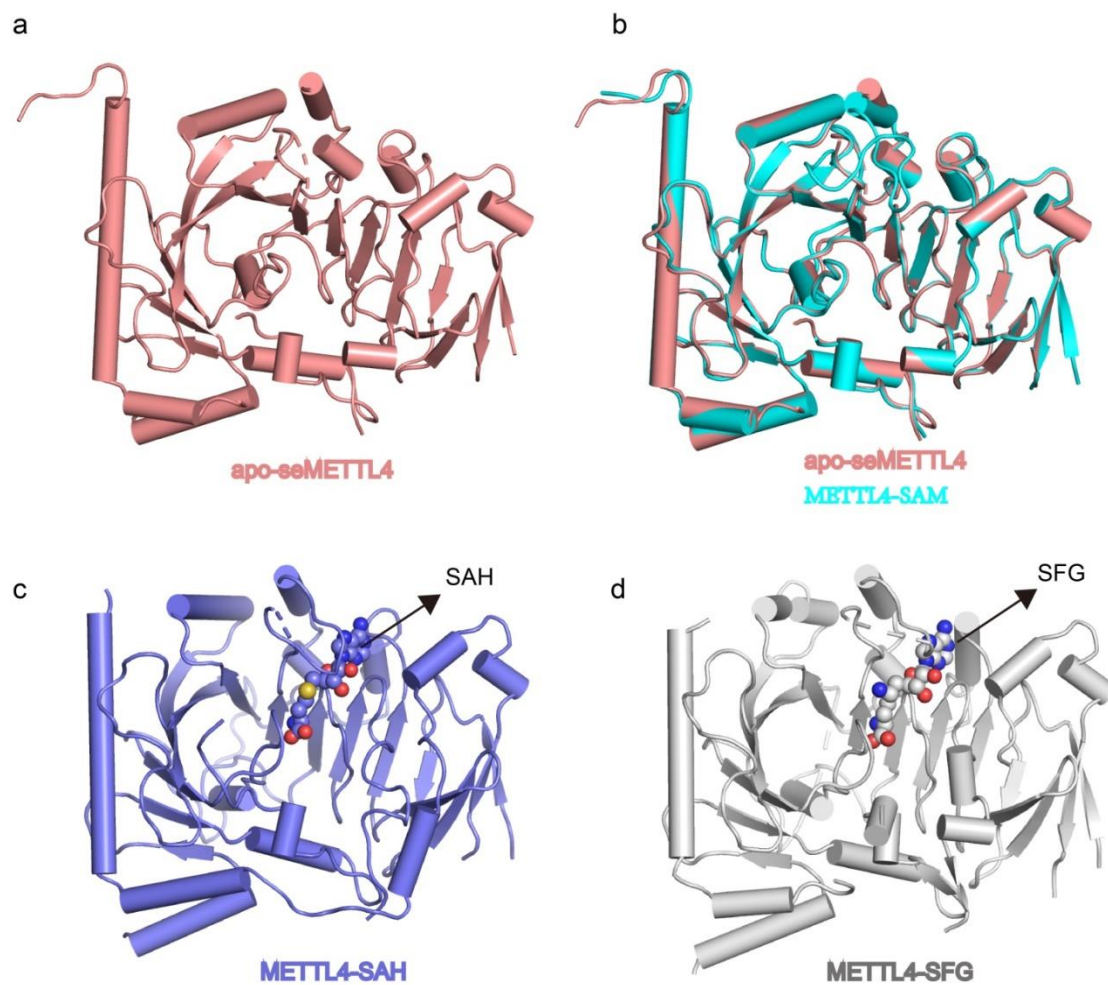

48

49 **Supplementary Fig.5** Crystal structures of METTL4 bound to different cofactors. **a.**

50 The apo-structure of SeMETTL4. **b.** Structure superposition of METTL4 bound to

51 SAM with apo-structure of Se-METTL4. **c-d.** Crystal structure of METTL4 bound to

52 SAH (**c**) and SFG (**d**), respectively.

53



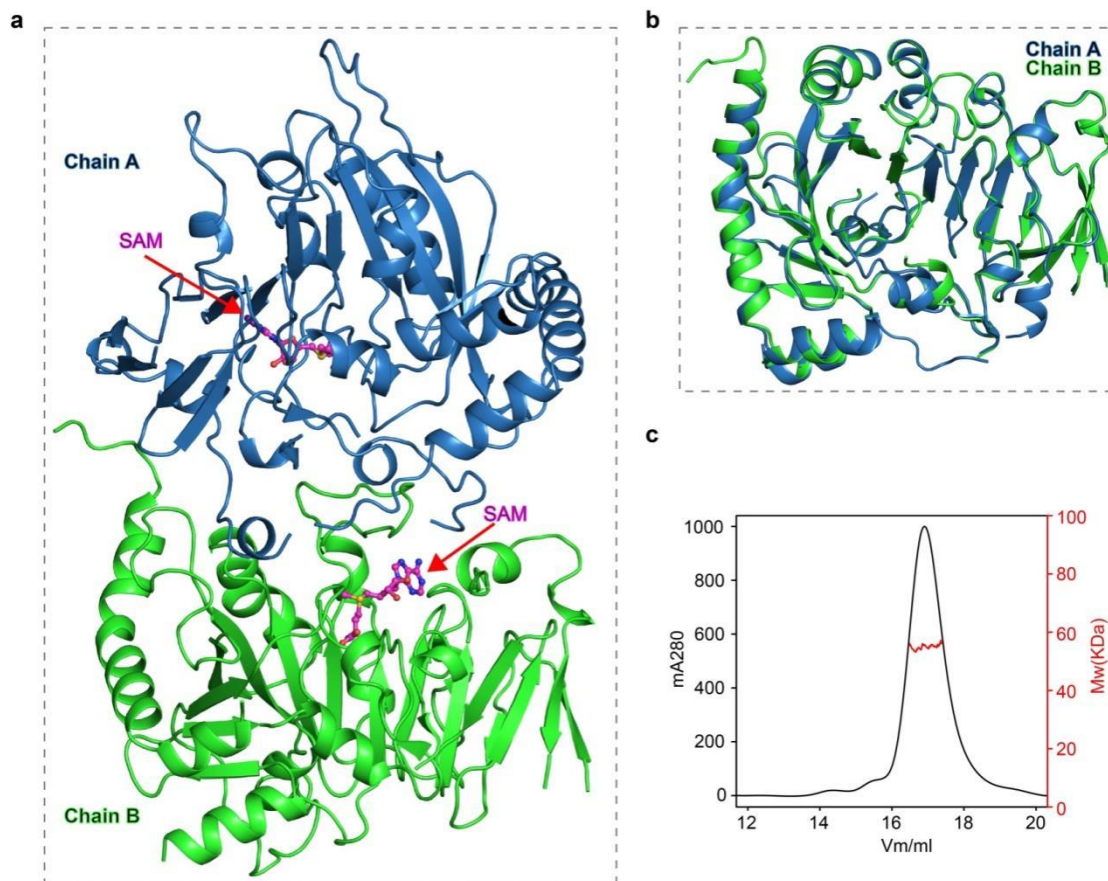

54

55 **Supplementary Fig.6** Crystal structures of METTL4-SAM complex. **a.** The  
 56 asymmetric unit of METTL4-SAM complex, and the chain A and chain B are shown  
 57 as blue and green, respectively. **b.** Structure superposition of the chain A and chain B  
 58 in **(a)**. **c.** The molecular weight of METTL4 in solvent was measured by the elution  
 59 profile of analytical SEC-MALS. The measured molecular weight of METTL4 is 54.7  
 60 KDa which is similar to the theoretical weight of 47.9 KDa.

61



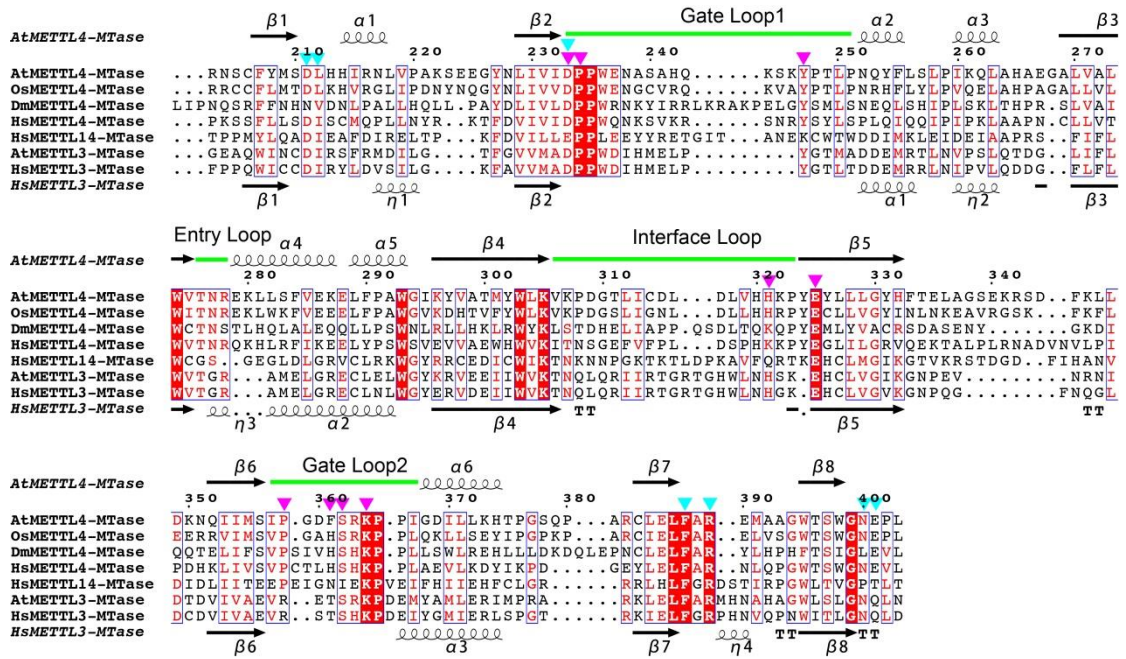

70

71 **Supplementary Fig.8** Sequence alignment of the MTase domain from METTL4,

72 METTL3 and METTL14 from different species, and the residues involved in Am

73 interaction observed in METTL4 are indicated by magenta triangle. Residues involved

74 in SAM binding are indicated by cyan triangle.

75

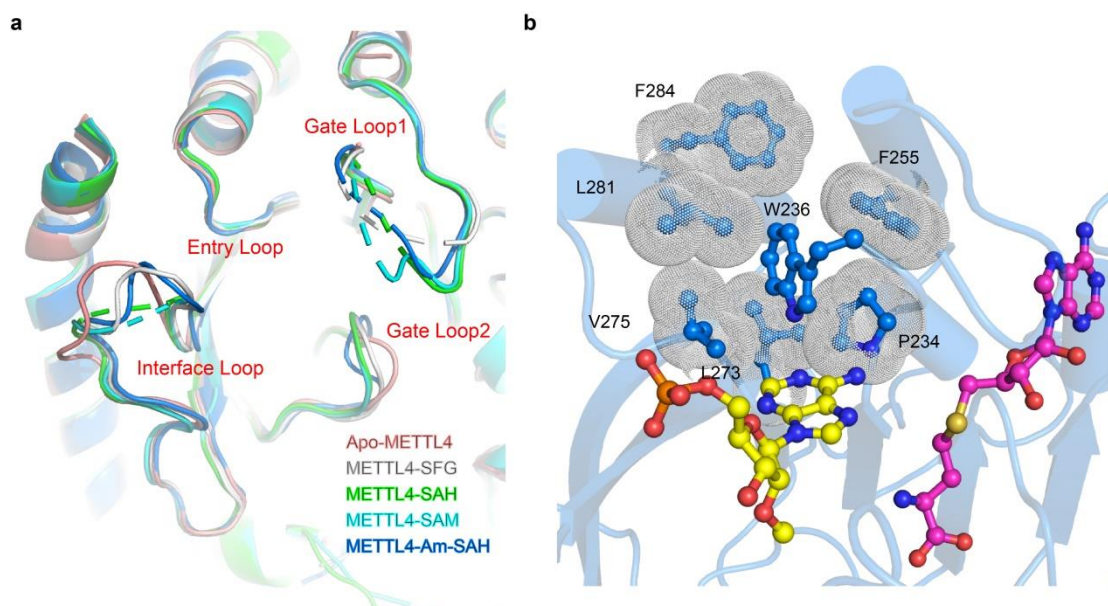

76

77 **Supplementary Fig.9** Superposition of apo-METTL4 and METTL4 bound to SAM

78 and different analogues. **a.** Superposition of the four loops of apo-METTL4 and

79 METTL4 bound to SAM and different analogues. **b.** The conserved aromatic residues

80 W236 from the DPPW motif is buried by a hydrophobic pocket.

81

82 **Supplementary Table 1 Primers used in this study**

| Name                                  | Sequence (5' -3' )                                             |
|---------------------------------------|----------------------------------------------------------------|
| <b>Primers for transgeneic plant</b>  |                                                                |
| Promoter-F                            | ggtaccagccaatgccaccaccgag                                      |
| Promoter-R                            | ggcggatccttaacggctccaacactctctag                               |
| HA-METTL4-F                           | cgggatccatg<br>taccatac gatgttccagattacgctatggcgaaaactgataagct |
| FLAG-METTL4-R                         | gcgtcgacctatgtgtcgtcctcgtctttgtagtcaac                         |
| APPA-F                                | gcaccgcctgcagaaaatgcaagtgcctcatcag                             |
| APPA-R                                | ctgcaggcgggtgcaataactataagattgtagccttcttcag                    |
| <b>Primers for RT-PCR</b>             |                                                                |
| METTL4-F                              | atggcgaaaactgataagctagctc                                      |
| METTL4-R                              | ctaaactttcaaaaagtatctcgagtcctg                                 |
| ACTIN2-F                              | ccctcagcacattccagcagatgt                                       |
| ACTIN2-R                              | tgtgaacgattcctggacctgcct                                       |
| <b>Primers for protein expression</b> |                                                                |
| METTL4-BamH I -F                      | cgcgatccatggcgaaaactgataagctagctcaattccttgattc                 |
| METTL4-Sal I -R                       | acgcgtcgacttactaaactttcaaaaagtatctcgagtcctgaaag                |
| P358S362/DE -F                        | gaaccagataatcatgagcatcgatgggtgattttgagaggaaaccccccaattggagata  |
| P358S362/DE -R                        | tatctccaattgggggtttcctctcaaaatcaccatcgatgctcatgattatctggttc    |
| K364D-F                               | gcatccctgggtgatttttcgaggaccccccaattggagataacta                 |
| K364D-R                               | tagtataatctccaattgggggggtccctcgaaaaatcaccagggatgc              |
| D233A-F                               | ggctacaatcttatagttattgctccgccttgggaaaatgcaagt                  |
| D233A-R                               | acttgcattttcccaaggcggagcaataactataagattgtagcc                  |
| N400A-F                               | gccggatggacctcttggggagccgaaccgcttcactttcaggac                  |
| N400A-R                               | gtcctgaaagtgaagcgggttcggctccccaagagggtccatccggc                |
| E401A-F                               | cggatggacctcttggggaaacgcaccgcttcactttcaggactcga                |
| E401A-R                               | tcgagtcctgaaagtgaagcgggtgcgtttccccaagagggtccatccg              |
| Y247A-F                               | gctcatcagaaatcaaaggctcctactttaccgaaccaa                        |
| Y247A-R                               | ttggttcggtaaagtaggagcctttgattttctgatgagc                       |
| F361A-F                               | tcatgagcatccctgggtgatgcttcgaggaaaccccccaattgg                  |
| F361A-R                               | ccaattgggggtttcctcgaagcatcaccagggatgctcatga                    |
| R278A-F                               | ggctttgtgggtgacaaatgcagagaaattactaagttttg                      |
| R278A-R                               | caaaacttagtaattttctctgcattttgtcaccacaaaagcc                    |
| H320A-R                               | ggtactcataaggtttatgagcgcaccaggtccagggtcgcaaatc                 |

|         |                                                     |
|---------|-----------------------------------------------------|
| H320A-R | ggtactcataaggtttatgagcgcaccaggtccaggtcgcaaatc       |
| H321A-F | gcgacctggacctggtccatgctaaaccttatgagtaccttcta        |
| H321A-R | tagaaggtactcataaggttttagcatggaccaggtccaggtcgc       |
| K322A-F | acctggacctggtccatcatgcaccttatgagtaccttctacta        |
| K322A-R | tagtagaaggtactcataaggtgcatgatggaccaggtccaggt        |
| R389A-F | cggtgccttgagctatgtgcggcggaatggctgccggatggacc        |
| R389A-R | ggtccatccggcagccatttccgccgcaaatagctcaaggcaccg       |
| R49K-F  | gtttcaccttctgcttactactctaagttcttcaattcgaagcaactcaat |
| R49K-R  | attgagttgcttcgaattgaagaacttagagtagtaagcagaaggtgaaac |
| R49N-F  | gtttcaccttctgcttactactctaatttcttcaattcgaagcaactcaat |
| R49N-R  | attgagttgcttcgaattgaagaaattagagtagtaagcagaaggtgaaac |
| R49E-F  | gtttcaccttctgcttactactctgaattcttcaattcgaagcaactcaat |
| R49E-R  | attgagttgcttcgaattgaagaattcagagtagtaagcagaaggtgaaac |
| R49A-F  | gtttcaccttctgcttactactctgctttcttcaattcgaagcaactcaat |
| R49A-R  | attgagttgcttcgaattgaagaaagcagagtagtaagcagaaggtgaaac |

83
